# Supplementary material
Source: MDPI journal article supplement (https://www.mdpi.com/2075-163X/10/3/204)
Supplement: s1 [file s1]

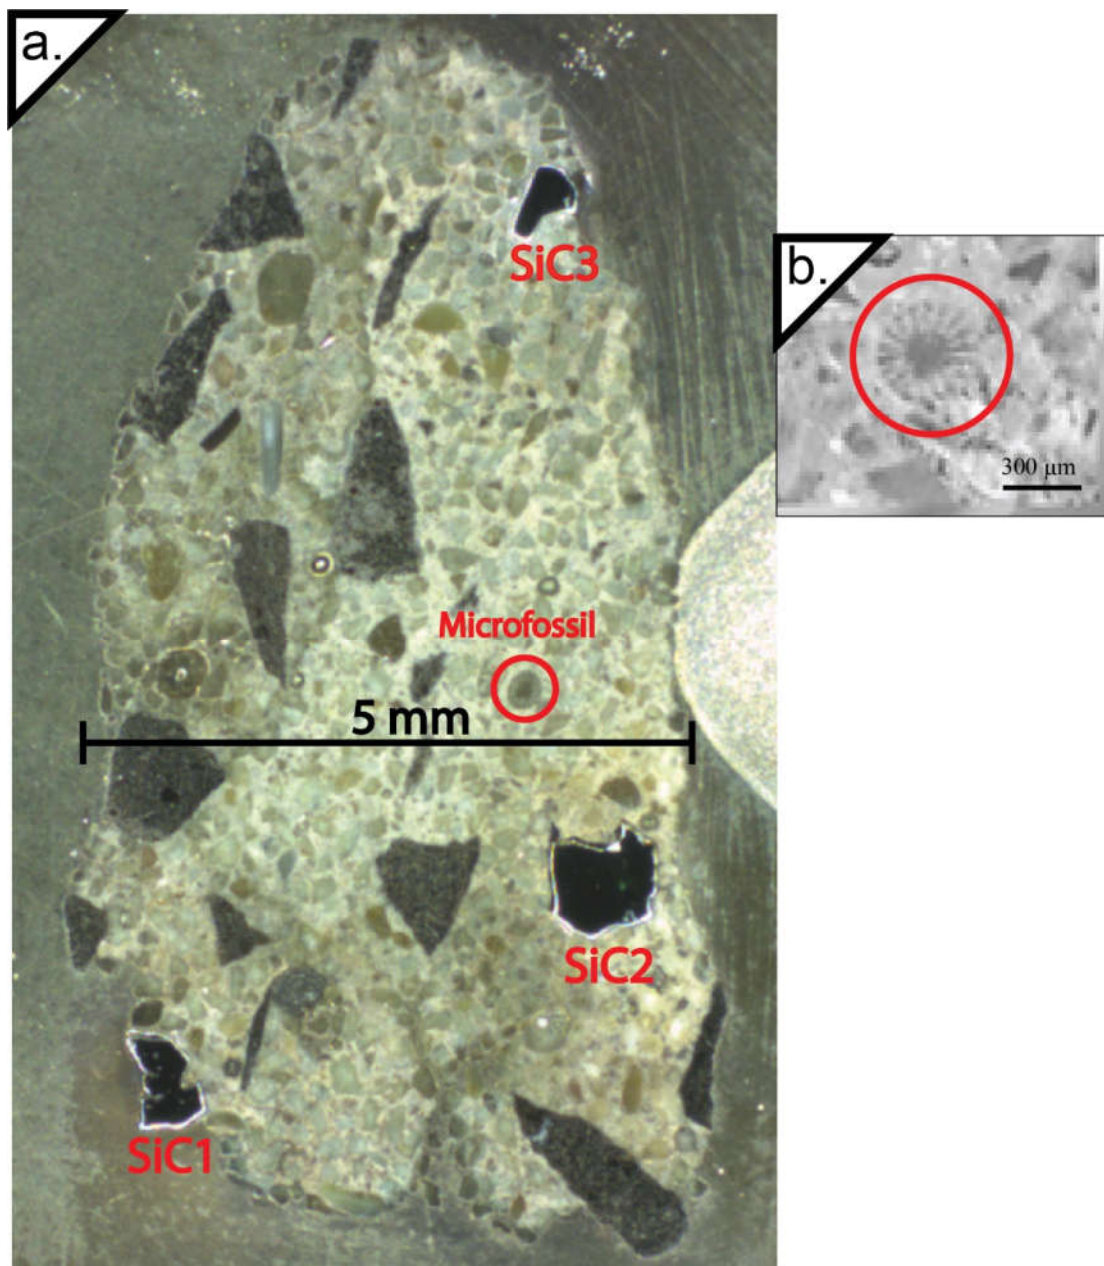

**Figure S1.** (a). Optical microscope image of the tuffite sample containing 3 SiC crystals. The red outline indicates the location of the microfossil/microfauna. (b). Microfossil/microfauna as seen at larger magnification.
